# Supplementary material for: Effects of the Cryptochrome CryB from Rhodobacter sphaeroides on Global Gene Expression in the Dark or Blue Light or in the Presence of Singlet Oxygen
Source: PubMed Central journal article supplement (PMC3320616; doi:10.1371/journal.pone.0033791), 2012-04-05
Supplement: pone.0033791.s003.pdf [file pone.0033791.s003.pdf]

**Table S2. Real time RT-PCR primer sequences.** The primer list contains the corresponding *R. sphaeroides* gene annotations and gene names. Primers are listed including their annealing temperature, primer efficiency and oligonucleotide sequences (5' – 3').

| primer pair | gene                     | efficiency | annealing temp. [°C] | sequence (5' – 3')<br>forward / reverse     |
|-------------|--------------------------|------------|----------------------|---------------------------------------------|
| RSP_1669    | <i>rpoZ</i>              | 2.02       | 59                   | ATCGCGGAAGAGACCCAGAG / GAGCAGCGCCATCTGATCCT |
| RSP_0030    |                          | 2.02       | 56                   | AGGAGATCATGCGCTACG / GATCAGCGGCTGGTAGAA     |
| RSP_0224    |                          | 1.74       | 56                   | TACGCTTGGCGACATGGA / GTTGCGGATTGGCTGCTT     |
| RSP_0257    | <i>pufL</i>              | 2.34       | 56                   | ACACCTACGGCAACTTCC / ATCGAGTAGCCGACCAGA     |
| RSP_0296    | <i>cycA</i>              | 1.92       | 56                   | TCAACCAGTGCCAGACCT / GTCCGCTTCTTCTTCCAG     |
| RSP_0314    | <i>pucBA</i>             | 2.01       | 56                   | CGAAGCCGAAGAAGTTCA / TTCACCACGAGCCAGATT     |
| RSP_0402    |                          | 1.85       | 56                   | GGTTCCACATCGGCTATC / CCTCAAGACGCTCCTCAT     |
| RSP_0601    | <i>rpoH<sub>II</sub></i> | 2.09       | 56                   | GCCGATGAACGACCTGAT / AAGAACAGCGCCTTCTGG     |
| RSP_0693    | <i>ccoP</i>              | 2.11       | 56                   | TCCGAACCTGCTGGATGA / TTGTCGCGAAGATGGTG      |
| RSP_0694    | <i>ccoQ</i>              | 1.89       | 56                   | GTCTTCTTCGAGGTTCTG / GGTTGTAGGCCACATACT     |
| RSP_0847    |                          | 1.87       | 56                   | GCGCACGAACAATCAGAG / TGGCGCAACCTGTAGATG     |
| RSP_0905    | <i>sitB</i>              | 1.97       | 56                   | CTATGTGCCGCAATCCGA / AACACGCGTTCCTCTGA      |
| RSP_0927    | <i>lyrS</i>              | 2.03       | 56                   | GTTCTGCTCGACTATCC / GTGAGGTCGTGCATCTTC      |
| RSP_0994    | <i>phaD</i>              | 2.02       | 56                   | GTCTTCTTCGAGGTTCTG / GGTTGTAGGCCACATACT     |
| RSP_1092    | <i>rpoE</i>              | 2.04       | 56                   | GTCTGGCAGAAGGCTCAT / GTTCTCTGCTGCATCTC      |
| RSP_1112    | <i>pnp</i>               | 2.09       | 56                   | GACTATGCCGCGCTCTAT / GCTCGTCTCCGAGATGAT     |
| RSP_1126    | <i>rnr</i>               | 2.00       | 56                   | ACCGGCTGATCGAGGAAT / GTTCAGATGCGCGGTCTT     |
| RSP_1173    | <i>dnaK</i>              | 1.94       | 56                   | CGAATGCGGATCGTCAA / CCGGTCCATGCTGATGAA      |
| RSP_1518    | <i>prrA</i>              | 2.11       | 56                   | GCTTCTCGTGGACGATGA / AGGTCCACCACTGCATAG     |
| RSP_1520    | <i>prrB</i>              | 1.97       | 56                   | AGTTCCAGGCGCTGATGA / AGGATCCCGATGACGATG     |
| RSP_1546    | <i>bfr</i>               | 2.09       | 56                   | CAGCGCATCATCTTCTCTC / ATAGTCGCGCACCTTCTC    |
| RSP_1971    | <i>rnd</i>               | 2.06       | 56                   | ACGAATGCCGAAGAGCTG / TTCCGACTTGCCCTTGAG     |
| RSP_2131    | <i>rne</i>               | 2.01       | 56                   | TGCGGTTGTCAACTTCTCT / TCGCGTCTTGAATTCT      |
| RSP_2234    |                          | 1.89       | 56                   | ATGCCTCGACGCTCTATG / CACCTCGAAGCCGTAGAA     |
| RSP_2247    | <i>fusA</i>              | 1.93       | 56                   | TATACCTGCGGCAAGACG / CGACAGTTCGGTGCTCAT     |
| RSP_2293    | <i>clpA</i>              | 1.88       | 56                   | CTACGACGCGGTCAACTT / CGGCAGAGAACCCTGAATG    |
| RSP_2346    |                          | 1.90       | 56                   | CGGCTTCGCCAATGTCTTCG / AGGCCGTTGCTGATGCTGA  |
| RSP_2389    |                          | 2.24       | 56                   | CCAATTCGACCTGACAC / GTCACGGTCGATCAGAAC      |
| RSP_2395    |                          | 2.01       | 56                   | GAAGGACAACCGCATCAC / TGGCAGGAATAGCAGGAG     |
| RSP_2410    | <i>rpoH<sub>I</sub></i>  | 2.00       | 56                   | GATCGCCAAGGATCT / CTGGTCGCTGTCTTCA          |
| RSP_2843    | <i>hfq</i>               | 2.02       | 56                   | AGGACGCCTTTCTGAACC / TCGCCCTCGTAGAGATTG     |
| RSP_2877    | <i>coxL</i>              | 1.91       | 56                   | TACCAGCAGGCCAAGGAT / GGCGGTTGTTACCAGTT      |
| RSP_2879    |                          | 2.04       | 56                   | TGTACGCTGTTCGGACAT / AACCGCTCGAAGAACTGG     |
| RSP_3496    |                          | 1.97       | 56                   | TGGACGCTCCACAATCTC / CCTGTGCAACACCGGATA     |
| RSP_3539    |                          | 1.78       | 56                   | TGAACGCGCAGGAAGGCAAC / ATCACGCGCCAGATTGACCG |
| RSP_3571    | <i>znuA</i>              | 2.03       | 56                   | GATCACGGCGAACATGAG / GGCATCGTGAAGACGTA      |
| RSP_3667    |                          | 1.89       | 56                   | TGACGCTGACCGATGTGA / TGCGCCATCCGTATGAGT     |
| RSP_3706    |                          | 1.96       | 56                   | TCGATCTCGGCATCTACC / CACATCCTTGCGCAGAAC     |
| RSP_3871    | <i>modA</i>              | 2.06       | 56                   | CAACAGCGTACGATCTCCT / GACCTCGTCCATCCAGTTCA  |
| RSP_4047    | <i>pdhAa</i>             | 2.03       | 56                   | ACAAGCGCATCACCTCCT / TGTCGTTGCCGAGATAGC     |
| RSP_4049    | <i>pdhAb</i>             | 2.23       | 56                   | CCAGCACAGCCAGGATTA / GATGCCGAAGGAGACGAT     |
| RSP_4050    | <i>pdhB</i>              | 2.11       | 56                   | GCACCGCACGAATATCAG / CGAGAGCGTCATCGACAT     |
| RSP_4157    |                          | 1.86       | 56                   | ATAAGATCCGCGAGCTGAAG / ATCACGCTGCTAATCGTCAC |
| RSP_4158    |                          | 1.99       | 56                   | GCGGCTATTCGGCGAAGATG / TCAAGCACCGCTCCTTCAG  |
| RSP_6108    | <i>pufBA</i>             | 2.00       | 62                   | CAGGCGCAGGAATTGCACTC / GAACCACGGACGCCAGATGT |
